# Supplementary material for: Safety and Efficacy of Botulinum Toxin to Preserve Gland Function after Radiotherapy in Patients with Head and Neck Cancer: A Prospective, Randomized, Placebo-Controlled, Double-Blinded Phase I Clinical Trial
Source: PubMed Central journal article supplement (PMC4798778; doi:10.1371/journal.pone.0151316), 2016-03-18
Supplement: pone.0151316.s007.pdf [file pone.0151316.s007.pdf]

# Radioprotektive Wirksamkeit von BoNT A/B

## Case Report Form

**Funktionsszintigraphische Untersuchungen zur Überprüfung der radioaktiven Wirksamkeit intraglandulär applizierten Botulinum-Toxins (BoNT) auf die Gl. submandibularis bei Patienten mit Plattenepithelkarzinom der oberen Luft- und Speisewege**

Pat.-ID-Nr.:

KKS-interne Nummer

# Radioprotektive Wirksamkeit von BoNT A/B

Pat.-ID-Nr.:

## Screening

Datum

(TT/MM/JJJJ)

## Einschlusskriterien

**(Probanden dürfen nur eingeschlossen werden, wenn alle Einschlusskriterien mit JA beantwortet wurden!)**

Patienten mit einem Plattenepithelkarzinom der oberen Luft- und Speisewege

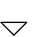Alter  $\geq$  40 Jahre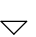

Schriftliche Einwilligung zur Teilnahme an der Studie

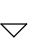

Kognitive und physische Fähigkeit des Probanden, den Versuchsablauf zu verstehen und einzuhalten

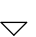

Frauen im gebärfähigen Alter ab 18 Jahren müssen eine der folgenden Methoden zur Empfängnisverhütung anwenden: orales Kontrazeptivum und Intrauterinpeessar (Spirale), seit mindestens einem Monat vor Studienbeginn, Barriere mit Spermizid (Kondom oder Diaphragma), Tubenligatur. Als Frauen im gebärfähigen Alter werden alle Frauen angesehen, deren letzte Menstruation nicht länger als 1 Jahr zurückliegt

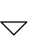

Keine Funktionseinschränkungen und Seiten-Unterschiede im Rahmen der initialen Speicheldrüsenfunktionsszintigraphie

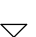

# Radioprotektive Wirksamkeit von BoNT A/B

Pat.-ID-Nr.:

## Ausschlusskriterien

(Patienten dürfen nur eingeschlossen werden, wenn alle Ausschlusskriterien mit NEIN beantwortet wurden!)

Z.n. Exstirpation der GL. submandibularis

  

Anamnetisch bekannte Erkrankungen der Speicheldrüsen

  

Regelmässige Einnahme von Medikamenten, die die Funktion der Speicheldrüsen beeinflussen

  

Z.n. vorheriger Bestrahlung der Halsweichteile

  

Schwangerschaft

  

Stillzeit

  

Irenat-Therapie

  

Überempfindlichkeit gegenüber Botulinum-Toxin oder einem der sonstigen Bestandteile



# Radioprotektive Wirksamkeit von BoNT A/B

Pat.-ID-Nr.:

## 3. Initiale Szintigraphie

Datum der Szintigraphie

(TT/MM/JJJJ)

### Ergebnis der Szintigraphie

Uptake der rechten Drüse

 %

Uptake der linken Drüse

 %

Uptake Unterschied rechts/links

 %

Ejektionsfraktion nach Zitrone rechte Drüse

 %

Ejektionsfraktion nach Zitrone linke Drüse

 %

Unterschied Ejektionsfraktion nach Zitrone rechts/links

 %

# Radioprotektive Wirksamkeit von BoNT A/B

Pat.-ID-Nr.:

## Studienbehandlung

### 5. Medikamentenapplikation (2 Wochen vor Bestrahlung)

Datum der Applikation

(TT/MM/JJJJ)

### 6. Strahlentherapie

| Woche | Datum der Strahlentherapie<br>(TT/MM/JJJJ) | Verabreichte Strahlendosis (Gy) |
|-------|--------------------------------------------|---------------------------------|
| 1     | <input type="text"/>                       | <input type="text"/>            |
| 2     | <input type="text"/>                       | <input type="text"/>            |
| 3     | <input type="text"/>                       | <input type="text"/>            |
| 4     | <input type="text"/>                       | <input type="text"/>            |
| 5     | <input type="text"/>                       | <input type="text"/>            |
| 6     | <input type="text"/>                       | <input type="text"/>            |

### 7. Chemotherapie

| Woche | Datum der Chemotherapie<br>(TT/MM/JJJJ) | Verabreichtes Medikament | Verabreichte Dosis (absolut) |
|-------|-----------------------------------------|--------------------------|------------------------------|
| 1     | <input type="text"/>                    | <input type="text"/> ... | <input type="text"/>         |
| 2     | <input type="text"/>                    | <input type="text"/> ... | <input type="text"/>         |
| 3     | <input type="text"/>                    | <input type="text"/> ... | <input type="text"/>         |
| 4     | <input type="text"/>                    | <input type="text"/> ... | <input type="text"/>         |
| 5     | <input type="text"/>                    | <input type="text"/> ... | <input type="text"/>         |
| 6     | <input type="text"/>                    | <input type="text"/> ... | <input type="text"/>         |

# Radioprotektive Wirksamkeit von BoNT A/B

Pat.-ID-Nr.:

## 7. Kontroll-Szintigraphie (4 Monate nach Strahlentherapie)

Datum der Szintigraphie

(TT/MM/JJJJ)

### Ergebnis der Szintigraphie

Uptake der rechten Drüse

 %

Uptake der linken Drüse

 %

Uptake-Unterschied rechts/links

 %

Ejektionsfraktion nach Zitrone rechte Drüse

 %

Ejektionsfraktion nach Zitrone linke Drüse

 %

Unterschied Ejektionsfraktion nach Zitrone rechts/links

 %

# Radioprotektive Wirksamkeit von BoNT A/B

Pat.-ID-Nr.: 

## Studienende

Datum:  (TT/MM/JJJJ)

### Art des Studienendes:

Studienende wie geplant  Abbruch wegen AE   wenn ja, bitte AE Nr. angeben Abbruch wegen SAE   wenn ja, bitte SAE Nr. angeben Mangelnde Compliance  Einwilligung zurückgezogen  
wenn ja, dürfen weitere Daten  
erhoben werden  Tod   wenn ja, Datum Todesursache  

Andere Todesursache, bitte definieren:

Anderer Abbruchgrund  

wenn ja, bitte definieren:



**Radioprotektive Wirksamkeit von BoNT A/B**Pat.-ID-Nr.: **Begleitmedikation**

| Nr                   | Medikament (Generic Name) | Indikation               | Von                  | Bis                  | Ongoing                | AE relevant            |
|----------------------|---------------------------|--------------------------|----------------------|----------------------|------------------------|------------------------|
| <input type="text"/> | <input type="text"/> ...  | <input type="text"/> ... | <input type="text"/> | <input type="text"/> | <input type="text"/> ▼ | <input type="text"/> ▼ |
| <input type="text"/> | <input type="text"/> ...  | <input type="text"/> ... | <input type="text"/> | <input type="text"/> | <input type="text"/> ▼ | <input type="text"/> ▼ |
| <input type="text"/> | <input type="text"/> ...  | <input type="text"/> ... | <input type="text"/> | <input type="text"/> | <input type="text"/> ▼ | <input type="text"/> ▼ |
| <input type="text"/> | <input type="text"/> ...  | <input type="text"/> ... | <input type="text"/> | <input type="text"/> | <input type="text"/> ▼ | <input type="text"/> ▼ |
| <input type="text"/> | <input type="text"/> ...  | <input type="text"/> ... | <input type="text"/> | <input type="text"/> | <input type="text"/> ▼ | <input type="text"/> ▼ |
| <input type="text"/> | <input type="text"/> ...  | <input type="text"/> ... | <input type="text"/> | <input type="text"/> | <input type="text"/> ▼ | <input type="text"/> ▼ |
| <input type="text"/> | <input type="text"/> ...  | <input type="text"/> ... | <input type="text"/> | <input type="text"/> | <input type="text"/> ▼ | <input type="text"/> ▼ |
| <input type="text"/> | <input type="text"/> ...  | <input type="text"/> ... | <input type="text"/> | <input type="text"/> | <input type="text"/> ▼ | <input type="text"/> ▼ |
| <input type="text"/> | <input type="text"/> ...  | <input type="text"/> ... | <input type="text"/> | <input type="text"/> | <input type="text"/> ▼ | <input type="text"/> ▼ |
| <input type="text"/> | <input type="text"/> ...  | <input type="text"/> ... | <input type="text"/> | <input type="text"/> | <input type="text"/> ▼ | <input type="text"/> ▼ |
| <input type="text"/> | <input type="text"/> ...  | <input type="text"/> ... | <input type="text"/> | <input type="text"/> | <input type="text"/> ▼ | <input type="text"/> ▼ |

Bitte überprüfen Sie, ob es sich bei der Indikation um ein neu aufgetretenes Adverse Event handelt und dokumentieren Sie dies gegebenenfalls im Formular Adverse Event

## Radioprotektive Wirksamkeit von BoNT A/B

Pat.-ID-Nr.:

### Adverse Event

**Adverse Event Description:**

**Serious:** 0 = NO; 1 = YES --> If YES, please send SAE report form.

**Intensity:** 1 = mild; 2 = moderate; 3 = severe

**Therapy of event:** 0 = NO; 1 = Medication; 2 = Other; 3 = Medication + Other  
 Medication has to be documented in the Concomitant Medication Form. Other has to be documented as an Comment.

**Outcome:** 1 = recovered/ resolved; 2 = recovering/ resolving; 3 = not recovered/ not resolved; 4 = recovered/ resolved with sequale; 5 = fatal; 6 = unknown

**Relation of event to**

**Trial Medication:** 1 = related; 2 = probably related; 3 = possibly related; 4 = unlikely; 5 = not related; 6 = not assessable

**Action taken with** 1 = drug withdrawn; 2 = dose reduced; 3 = dose increased; 4 = dose not changed; 5 = unknown; 6 = not applicable

**Trial Medication:** Interruption of medication has to be documented as two events ( 1. Event: dose reduced; 2. Event: dose increased)

| AE No                                                   | Event                                                  | Start Date                                              | End Date                                                | Ongoing                                                                                                                     | Serious                                                                                                                     | Intensity                                                                                                                   | Therapy of Event                                                                                                            |
|---------------------------------------------------------|--------------------------------------------------------|---------------------------------------------------------|---------------------------------------------------------|-----------------------------------------------------------------------------------------------------------------------------|-----------------------------------------------------------------------------------------------------------------------------|-----------------------------------------------------------------------------------------------------------------------------|-----------------------------------------------------------------------------------------------------------------------------|
| <input style="width: 30px; height: 15px;" type="text"/> | <input style="width: 80%; height: 15px;" type="text"/> | <input style="width: 60px; height: 15px;" type="text"/> | <input style="width: 60px; height: 15px;" type="text"/> | <input style="width: 30px; height: 15px;" type="text"/> <input style="width: 15px; height: 15px;" type="button" value="v"/> | <input style="width: 30px; height: 15px;" type="text"/> <input style="width: 15px; height: 15px;" type="button" value="v"/> | <input style="width: 30px; height: 15px;" type="text"/> <input style="width: 15px; height: 15px;" type="button" value="v"/> | <input style="width: 30px; height: 15px;" type="text"/> <input style="width: 15px; height: 15px;" type="button" value="v"/> |
| <input style="width: 30px; height: 15px;" type="text"/> | <input style="width: 80%; height: 15px;" type="text"/> | <input style="width: 60px; height: 15px;" type="text"/> | <input style="width: 60px; height: 15px;" type="text"/> | <input style="width: 30px; height: 15px;" type="text"/> <input style="width: 15px; height: 15px;" type="button" value="v"/> | <input style="width: 30px; height: 15px;" type="text"/> <input style="width: 15px; height: 15px;" type="button" value="v"/> | <input style="width: 30px; height: 15px;" type="text"/> <input style="width: 15px; height: 15px;" type="button" value="v"/> | <input style="width: 30px; height: 15px;" type="text"/> <input style="width: 15px; height: 15px;" type="button" value="v"/> |
| <input style="width: 30px; height: 15px;" type="text"/> | <input style="width: 80%; height: 15px;" type="text"/> | <input style="width: 60px; height: 15px;" type="text"/> | <input style="width: 60px; height: 15px;" type="text"/> | <input style="width: 30px; height: 15px;" type="text"/> <input style="width: 15px; height: 15px;" type="button" value="v"/> | <input style="width: 30px; height: 15px;" type="text"/> <input style="width: 15px; height: 15px;" type="button" value="v"/> | <input style="width: 30px; height: 15px;" type="text"/> <input style="width: 15px; height: 15px;" type="button" value="v"/> | <input style="width: 30px; height: 15px;" type="text"/> <input style="width: 15px; height: 15px;" type="button" value="v"/> |
| <input style="width: 30px; height: 15px;" type="text"/> | <input style="width: 80%; height: 15px;" type="text"/> | <input style="width: 60px; height: 15px;" type="text"/> | <input style="width: 60px; height: 15px;" type="text"/> | <input style="width: 30px; height: 15px;" type="text"/> <input style="width: 15px; height: 15px;" type="button" value="v"/> | <input style="width: 30px; height: 15px;" type="text"/> <input style="width: 15px; height: 15px;" type="button" value="v"/> | <input style="width: 30px; height: 15px;" type="text"/> <input style="width: 15px; height: 15px;" type="button" value="v"/> | <input style="width: 30px; height: 15px;" type="text"/> <input style="width: 15px; height: 15px;" type="button" value="v"/> |
| <input style="width: 30px; height: 15px;" type="text"/> | <input style="width: 80%; height: 15px;" type="text"/> | <input style="width: 60px; height: 15px;" type="text"/> | <input style="width: 60px; height: 15px;" type="text"/> | <input style="width: 30px; height: 15px;" type="text"/> <input style="width: 15px; height: 15px;" type="button" value="v"/> | <input style="width: 30px; height: 15px;" type="text"/> <input style="width: 15px; height: 15px;" type="button" value="v"/> | <input style="width: 30px; height: 15px;" type="text"/> <input style="width: 15px; height: 15px;" type="button" value="v"/> | <input style="width: 30px; height: 15px;" type="text"/> <input style="width: 15px; height: 15px;" type="button" value="v"/> |
| <input style="width: 30px; height: 15px;" type="text"/> | <input style="width: 80%; height: 15px;" type="text"/> | <input style="width: 60px; height: 15px;" type="text"/> | <input style="width: 60px; height: 15px;" type="text"/> | <input style="width: 30px; height: 15px;" type="text"/> <input style="width: 15px; height: 15px;" type="button" value="v"/> | <input style="width: 30px; height: 15px;" type="text"/> <input style="width: 15px; height: 15px;" type="button" value="v"/> | <input style="width: 30px; height: 15px;" type="text"/> <input style="width: 15px; height: 15px;" type="button" value="v"/> | <input style="width: 30px; height: 15px;" type="text"/> <input style="width: 15px; height: 15px;" type="button" value="v"/> |
| <input style="width: 30px; height: 15px;" type="text"/> | <input style="width: 80%; height: 15px;" type="text"/> | <input style="width: 60px; height: 15px;" type="text"/> | <input style="width: 60px; height: 15px;" type="text"/> | <input style="width: 30px; height: 15px;" type="text"/> <input style="width: 15px; height: 15px;" type="button" value="v"/> | <input style="width: 30px; height: 15px;" type="text"/> <input style="width: 15px; height: 15px;" type="button" value="v"/> | <input style="width: 30px; height: 15px;" type="text"/> <input style="width: 15px; height: 15px;" type="button" value="v"/> | <input style="width: 30px; height: 15px;" type="text"/> <input style="width: 15px; height: 15px;" type="button" value="v"/> |
| <input style="width: 30px; height: 15px;" type="text"/> | <input style="width: 80%; height: 15px;" type="text"/> | <input style="width: 60px; height: 15px;" type="text"/> | <input style="width: 60px; height: 15px;" type="text"/> | <input style="width: 30px; height: 15px;" type="text"/> <input style="width: 15px; height: 15px;" type="button" value="v"/> | <input style="width: 30px; height: 15px;" type="text"/> <input style="width: 15px; height: 15px;" type="button" value="v"/> | <input style="width: 30px; height: 15px;" type="text"/> <input style="width: 15px; height: 15px;" type="button" value="v"/> | <input style="width: 30px; height: 15px;" type="text"/> <input style="width: 15px; height: 15px;" type="button" value="v"/> |

**Comment:**  YES  
 NO

Comment 1:

Comment 2:

Comment 3:
